# Supplementary material for: Octopamine connects nutrient cues to lipid metabolism upon nutrient deprivation
Source: PubMed Central journal article supplement — Sci Adv. 2016 May 6;2(5):e1501372. doi: 10.1126/sciadv.1501372 (PMC4928904; doi:10.1126/sciadv.1501372), 2016-05-06
Supplement: 1501372_SM.pdf [file 1501372_SM.pdf]

## Supplementary Materials for

### **Octopamine connects nutrient cues to lipid metabolism upon nutrient deprivation**

Jun Tao, Yi-Cheng Ma, Zhong-Shan Yang, Cheng-Gang Zou, Ke-Qin Zhang

Published 6 May 2016, *Sci. Adv.* **2**, e1501372 (2016)

DOI: 10.1126/sciadv.1501372

#### **The PDF file includes:**

- fig. S1. LC-MS/MS detection of octopamine contents in worms.
- fig. S2. TLC analysis of total lipids extracted from worms.
- fig. S3. Overexpression of *tbh-1* enhances lipid hydrolysis in well-fed wild-type worms.
- fig. S4. Starvation does not alter the expression of *atgl-1*.
- fig. S5. A mutation in *tbh-1* (*n3247*) does not affect the expression of *fil-1* or *fil-2* in starved worms.
- fig. S6. Knockdown of *lips-6* by RNAi leads to reduced *lips-6* expression.
- fig. S7. Overexpression of *lips-6* in the intestine promotes lipid hydrolysis in well-fed WT worms.
- fig. S8. Octopamine fails to restore lipid hydrolysis and expression of *lips-6* in *ser-3* (*ad1774*) mutants during starvation.
- fig. S9. SER-3 in the neurons and muscle is not involved in lipid hydrolysis during starvation.
- fig. S10. SER-3 is involved in resistance to starvation.
- table S1. ChIP-qPCR analysis of the *tbh-1* promoter.

## Supplementary Figures

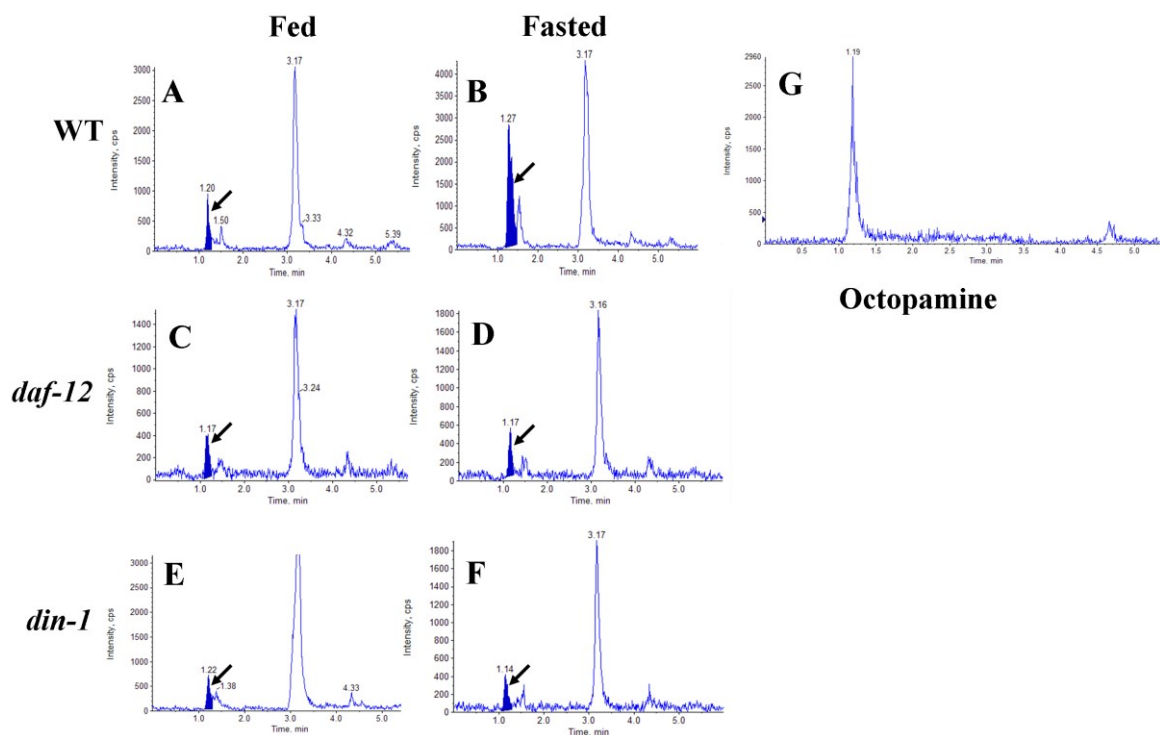

**fig. S1. LC-MS/MS detection of octopamine contents in worms.** Representative chromatograms of (A) well-fed wild-type (WT) worms, (B) starved WT worms, (C) well-fed *daf-12(rh61rh411)* mutants, (D) starved *daf-12(rh61rh411)* mutants, (E) well-fed *din-1(dh127)* worms, (F) starved *din-1(dh127)* worms, and (G) octopamine standard. cps, counts per second. Black arrows indicate the octopamine-specific peaks.

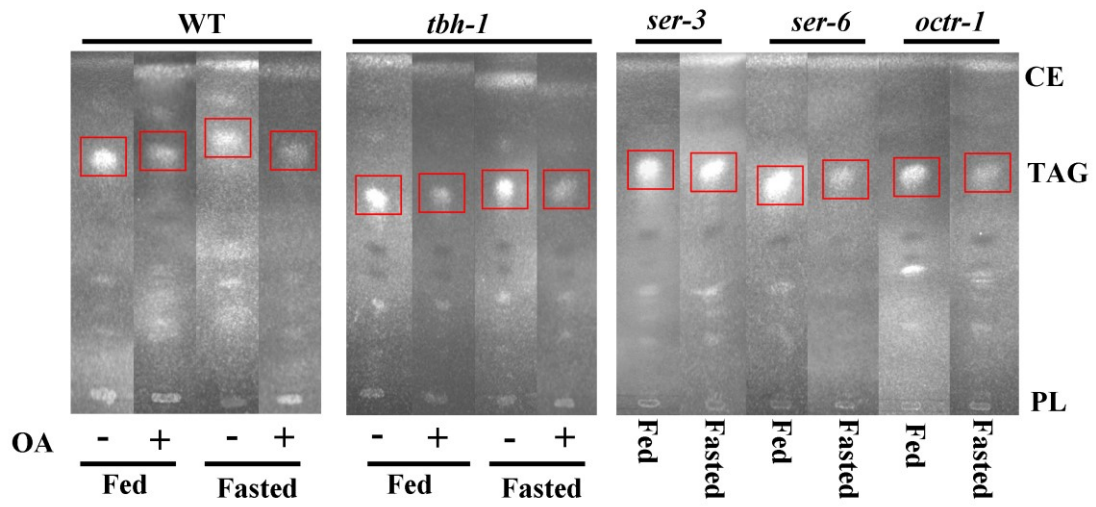

**fig. S2. TLC analysis of total lipids extracted from worms.** WT, wild-type worms; *tbh-1*, *tbh-1(n3247)*; *ser-3*, *ser-3(ad1774)*; *ser-6*, *ser-6(tm2146)*; *octr-1*, *octr-1(ok371)* mutants. CE, cholesterol ester; TAG, triacylglycerol; PL, phospholipids.

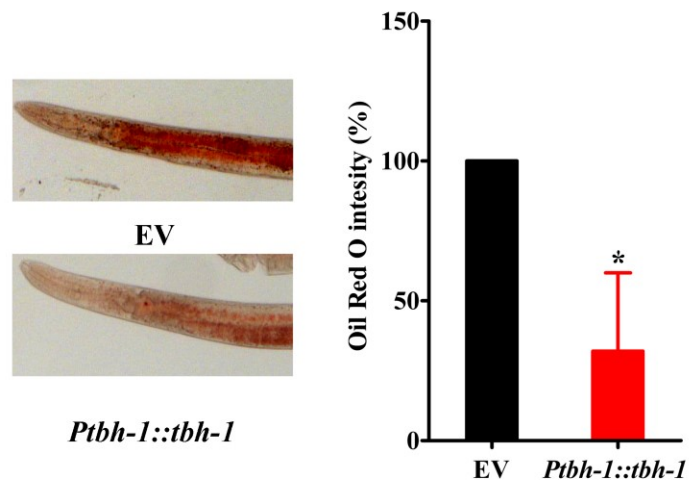

**fig. S3. Overexpression of *tbh-1* enhances lipid hydrolysis in well-fed wild-type worms.** The right panel represents relative Oil Red O intensity. EV, empty vector.  
\* $P < 0.05$ .

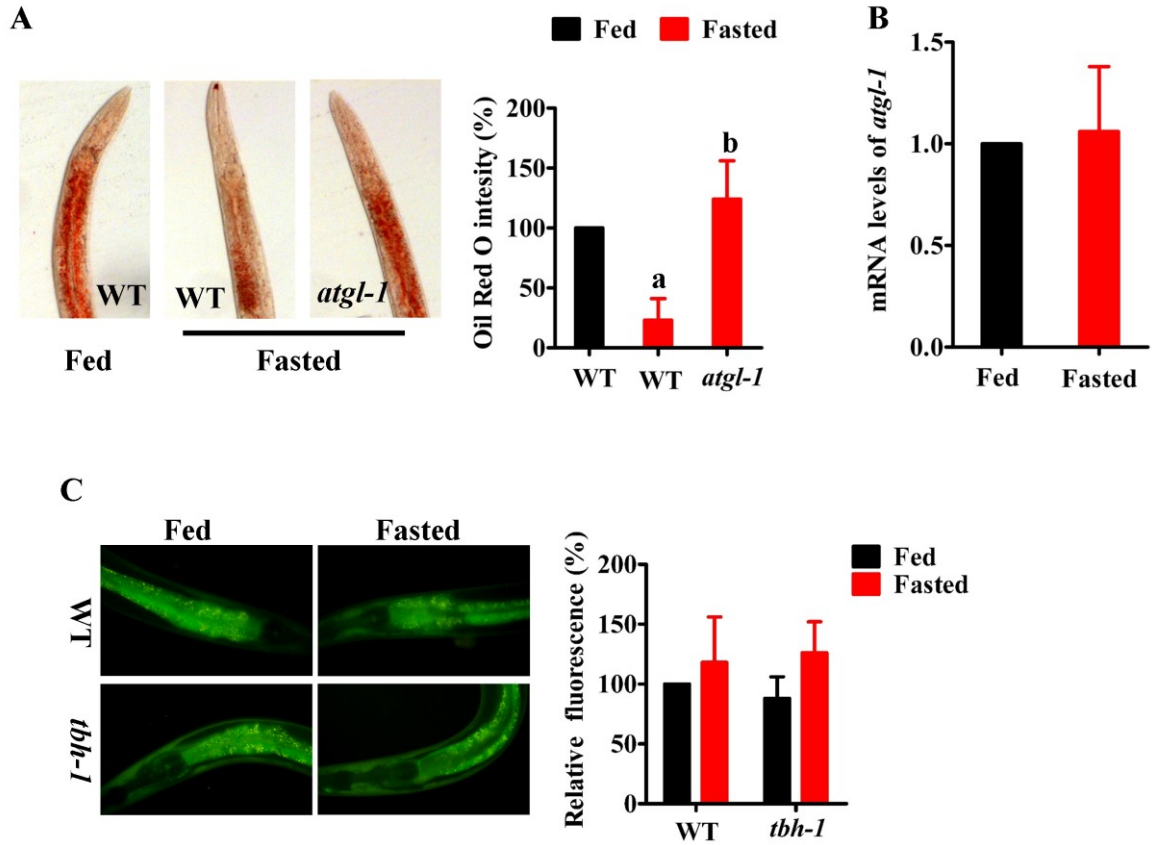

**fig. S4. Starvation does not alter the expression of *atgl-1*.** (A) The mutation in *atgl-1(tm3116)* led to lipid accumulation in starved worms. The right panel represents relative Oil Red O intensity. <sup>a</sup> $P < 0.05$  versus well-fed wild-type (WT) worms; <sup>b</sup> $P < 0.05$  versus starved WT worms. (B) mRNA levels of *atgl-1*. (C) Fluorescence microscopy of *Patgl-1::atgl-1::GFP*. The right panel shows quantification of GFP levels.

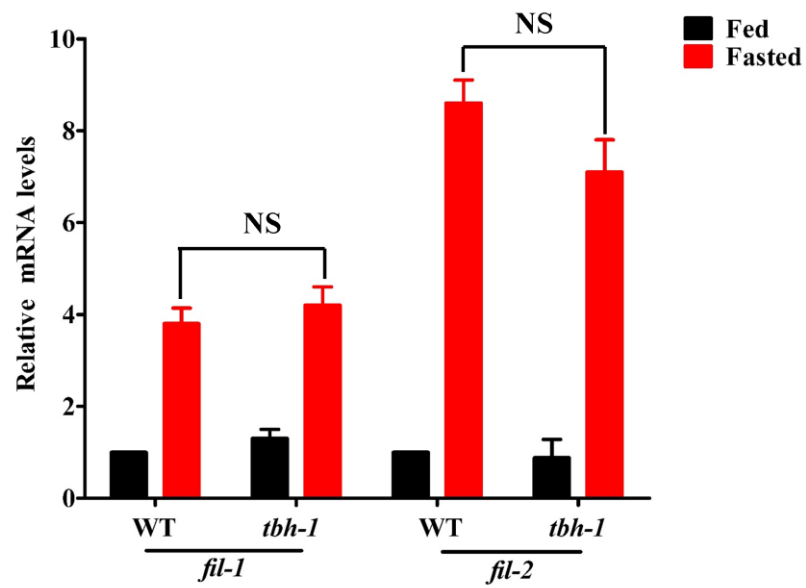

fig. S5. A mutation in *tbh-1(n3247)* does not affect the expression of *fil-1* or *fil-2*

in starved worms. WT, wild-type worms; NS, not significant.

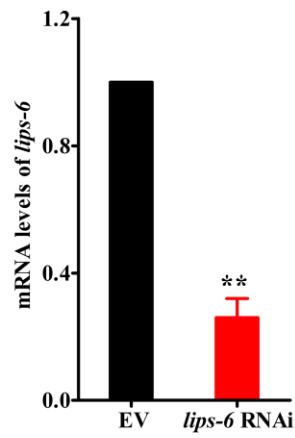

fig.

**S6. Knockdown of *lips-6* by RNAi leads to reduced *lips-6* expression.** EV, empty vector. \*\* $P < 0.01$ .

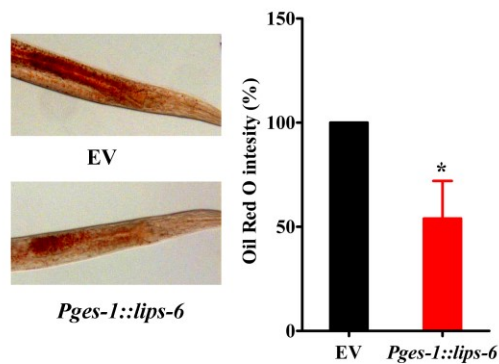

**fig. S7. Overexpression of *lips-6* in the intestine promotes lipid hydrolysis in well-fed WT worms.** The right panel represents relative Oil Red O intensity. EV, empty vector. \* $P < 0.05$ .

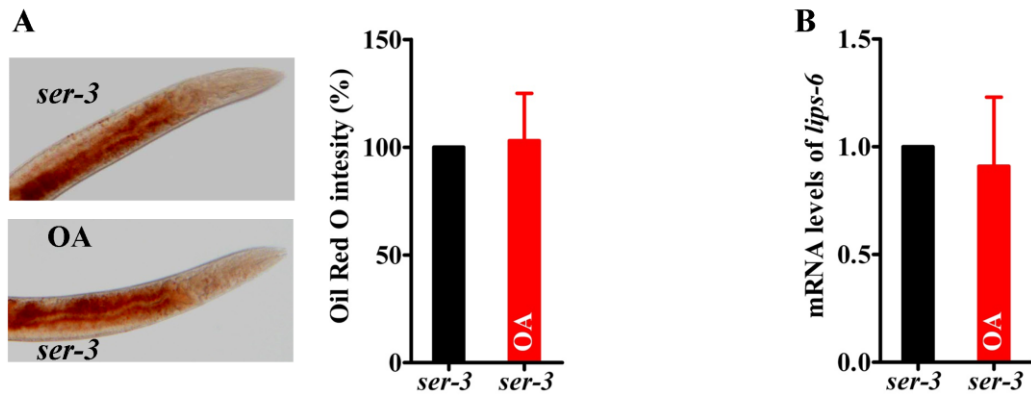

**fig. S8. Octopamine fails to restore lipid hydrolysis and expression of *lips-6* in *ser-3(ad1774)* mutants during starvation.** (A) Oil Red O staining. The right panel represents relative Oil Red O intensity. (B) mRNA levels of *lips-6*.



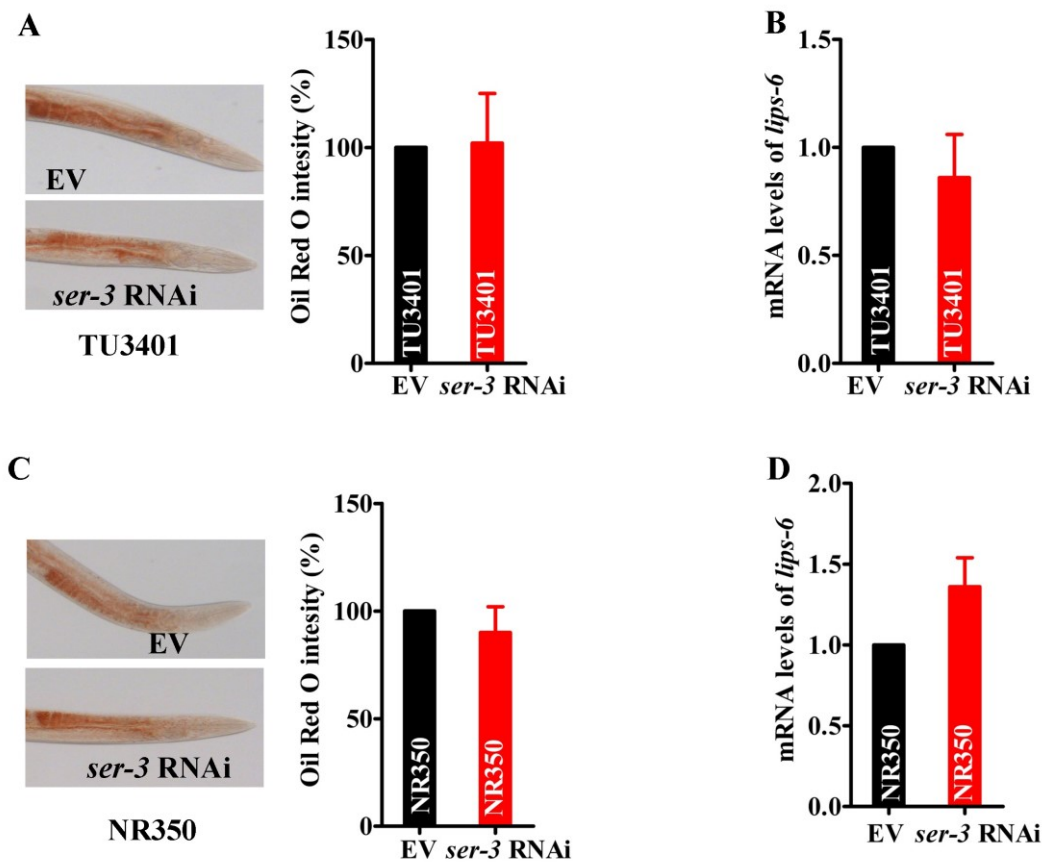

**fig. S9. SER-3 in the neurons and muscle is not involved in lipid hydrolysis during starvation.** (A and B) Neuronal-specific RNAi of *ser-3* (TU3401) did not alter lipid hydrolysis (A) and expression of *lips-6* (B). The right panel represents relative Oil Red O intensity. (C and D) Muscular-specific RNAi of *ser-3* (NR350) did not alter lipid hydrolysis (C) and expression of *lips-6* (D). The right panel represents relative Oil Red O intensity. EV, empty vector.

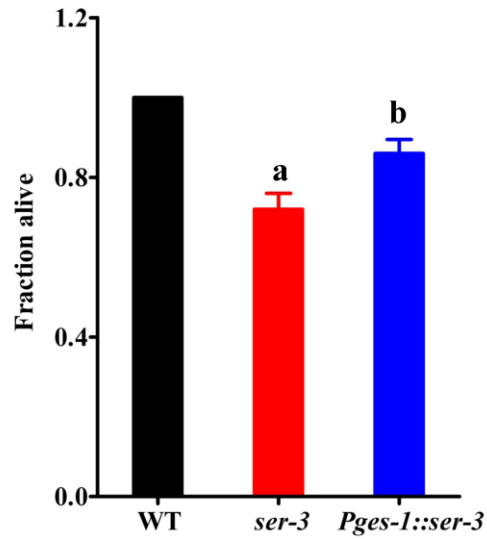

**fig. S10. SER-3 is involved in resistance to starvation.** A mutation in *ser-3(ad1774)* led to reduced rate of survival after three days of starvation. However, expression of *ser-3* in the intestine significantly suppressed the sensitivity of *ser-3(ad1774)* mutants to starvation. <sup>a</sup> $P < 0.05$  versus wild-type (WT) worms; <sup>b</sup> $P < 0.05$  versus *ser-3(ad1774)* worms.

**table S1. CHIP-qPCR analysis of the *tbh-1* promoter.**

| <b>Distances to ATG</b> |   | <b>Items</b> | <b>Mean ct</b> | <b><math>\Delta</math>ct</b> | <b><math>\Delta\Delta</math>ct</b> | <b><math>2^{-\Delta\Delta</math>ct}</b> |
|-------------------------|---|--------------|----------------|------------------------------|------------------------------------|-----------------------------------------|
| <b>-4139</b>            | 1 | Fed          | 21.62          | 11.42                        | 0                                  | 1                                       |
|                         |   | Input        | 10.2           |                              |                                    |                                         |
|                         |   | Fasted       | 21.24          | 9.54                         | -1.88                              | 3.68                                    |
|                         |   | Input        | 11.7           |                              |                                    |                                         |
|                         | 2 | Fed          | 20.96          | 10.53                        | 0                                  | 1                                       |
|                         |   | Input        | 10.43          |                              |                                    |                                         |
|                         |   | Fasted       | 21.75          | 8.98                         | -1.55                              | 2.93                                    |
|                         |   | Input        | 12.77          |                              |                                    |                                         |
|                         | 3 | Fed          | 22.08          | 11.05                        | 0                                  | 1                                       |
|                         |   | Input        | 11.03          |                              |                                    |                                         |
|                         |   | Fasted       | 21.21          | 9.23                         | -1.82                              | 3.53                                    |
|                         |   | Input        | 11.98          |                              |                                    |                                         |
| <b>-3193</b>            | 1 | Fed          | 21.98          | 10.44                        | 0                                  | 1                                       |
|                         |   | Input        | 11.54          |                              |                                    |                                         |
|                         |   | Fasted       | 20.51          | 9.18                         | -1.26                              | 2.39                                    |
|                         |   | Input        | 11.33          |                              |                                    |                                         |
|                         | 2 | Fed          | 22.23          | 10.44                        | 0                                  | 1                                       |
|                         |   | Input        | 11.79          |                              |                                    |                                         |
|                         |   | Fasted       | 21.29          | 9.44                         | -1                                 | 2                                       |
|                         |   | Input        | 11.85          |                              |                                    |                                         |
|                         | 3 | Fed          | 21.59          | 10.64                        | 0                                  | 1                                       |
|                         |   | Input        | 10.95          |                              |                                    |                                         |
|                         |   | Fasted       | 20.95          | 9.34                         | -1.3                               | 2.46                                    |
|                         |   | Input        | 11.61          |                              |                                    |                                         |
| <b>-2711</b>            | 1 | Fed          | 20.31          | 10.29                        | 0                                  | 1                                       |
|                         |   | Input        | 10.02          |                              |                                    |                                         |
|                         |   | Fasted       | 18.84          | 8.45                         | -1.84                              | 3.58                                    |
|                         |   | Input        | 10.39          |                              |                                    |                                         |
|                         | 2 | Fed          | 20.65          | 10.43                        | 0                                  | 1                                       |
|                         |   | Input        | 10.22          |                              |                                    |                                         |
|                         |   | Fasted       | 19             | 8.71                         | -1.72                              | 3.29                                    |
|                         |   | Input        | 10.29          |                              |                                    |                                         |
|                         | 3 | Fed          | 20.51          | 10.06                        | 0                                  | 1                                       |
|                         |   | Input        | 10.45          |                              |                                    |                                         |
|                         |   | Fasted       | 17.89          | 7.9                          | -2.16                              | 4.47                                    |
|                         |   | Input        | 9.99           |                              |                                    |                                         |
